# Supplementary material
Source: PubMed Central journal article supplement (PMC1783460)

## Supplementary Material

### **ZAP-70 kinase regulates HIV cell-to-cell spread and virological synapse formation**

Nathalie Sol-Foulon<sup>1\*</sup>, Marion Sourisseau<sup>1\*</sup>, Françoise Porrot<sup>1</sup>, Maria-Isabel Thoulouze<sup>2</sup>, Céline Trouillet<sup>1</sup>, Cinzia Nobile<sup>3</sup>, Fabien Blanchet<sup>1</sup>, Vincenzo di Bartolo<sup>2</sup>, Nelly Noraz<sup>4</sup>, Naomi Taylor<sup>4</sup>, Andres Alcover<sup>2</sup>, Claire Hivroz<sup>3</sup>, Olivier Schwartz<sup>1</sup>

**Sup. Fig.1. Characteristics of the various Jurkat cell derivatives. (A) ZAP-70 expression in Jurkat clones.** Cell lysates from the indicated Jurkat clones were analyzed by Western blot with anti-ZAP-70 mAbs (upper panel) and, as a control, with Vav mAbs (lower panel). Data are representative of 2 independent experiments. **(B) Surface expression of various receptors in Jurkat clones.** Cells were stained with antibodies against the indicated surface receptors and analyzed by flow cytometry. Data are representative of 3 independent experiments.

**Sup. Fig.2. Characteristics of ZAP-70 positive and negative primary CD4+ lymphocytes. (A) ZAP-70 expression.** Cell lysates from 2 control and 2 ZAP-70-negative individuals were analyzed by Western blot with anti-ZAP-70 mAbs (upper panel) and, as a control, with anti-actin mAbs (lower panel). **(B) Surface expression of various receptors.** Cells were stained with antibodies against the indicated surface receptors and analyzed by flow cytometry. Data are representative of 2-3 independent experiments.

**A**

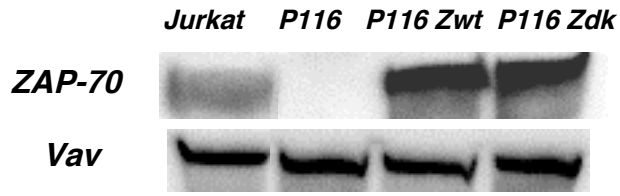

**B**

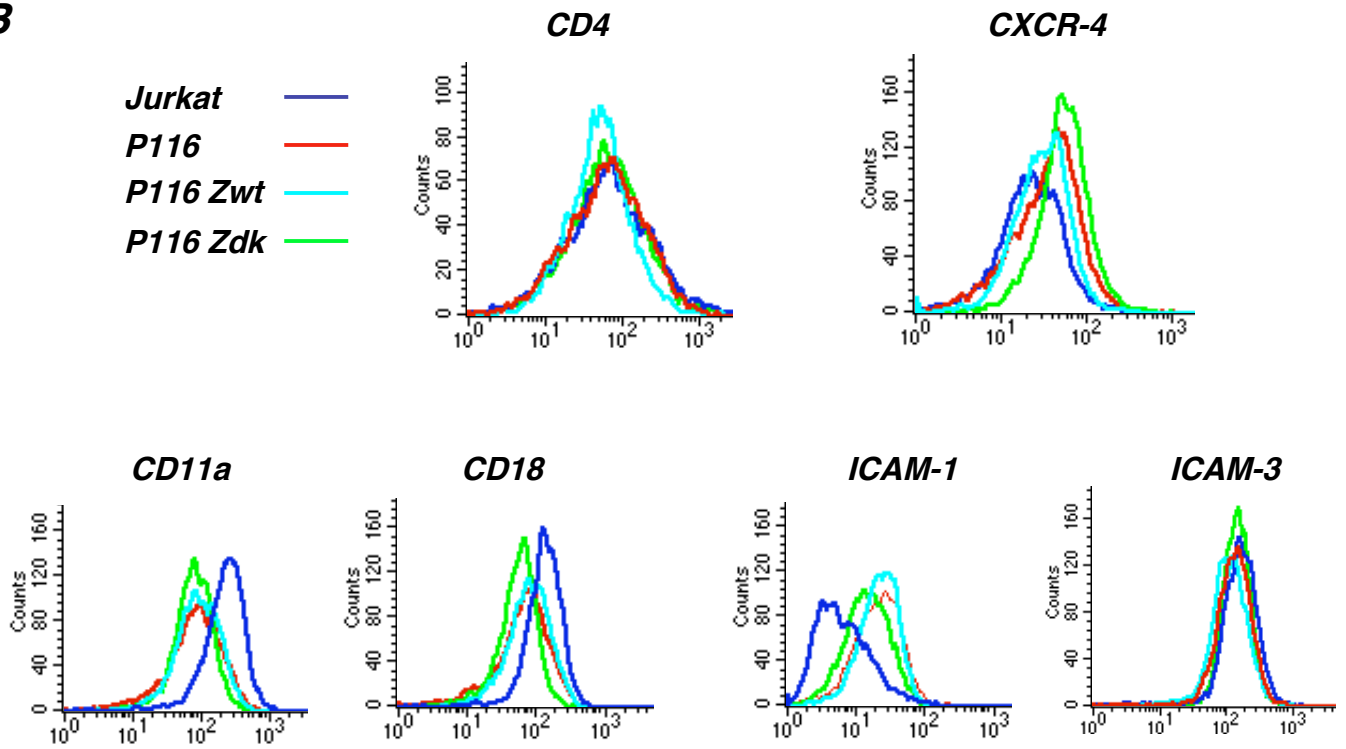

**A**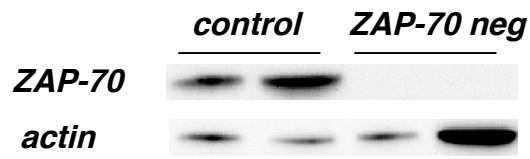**B**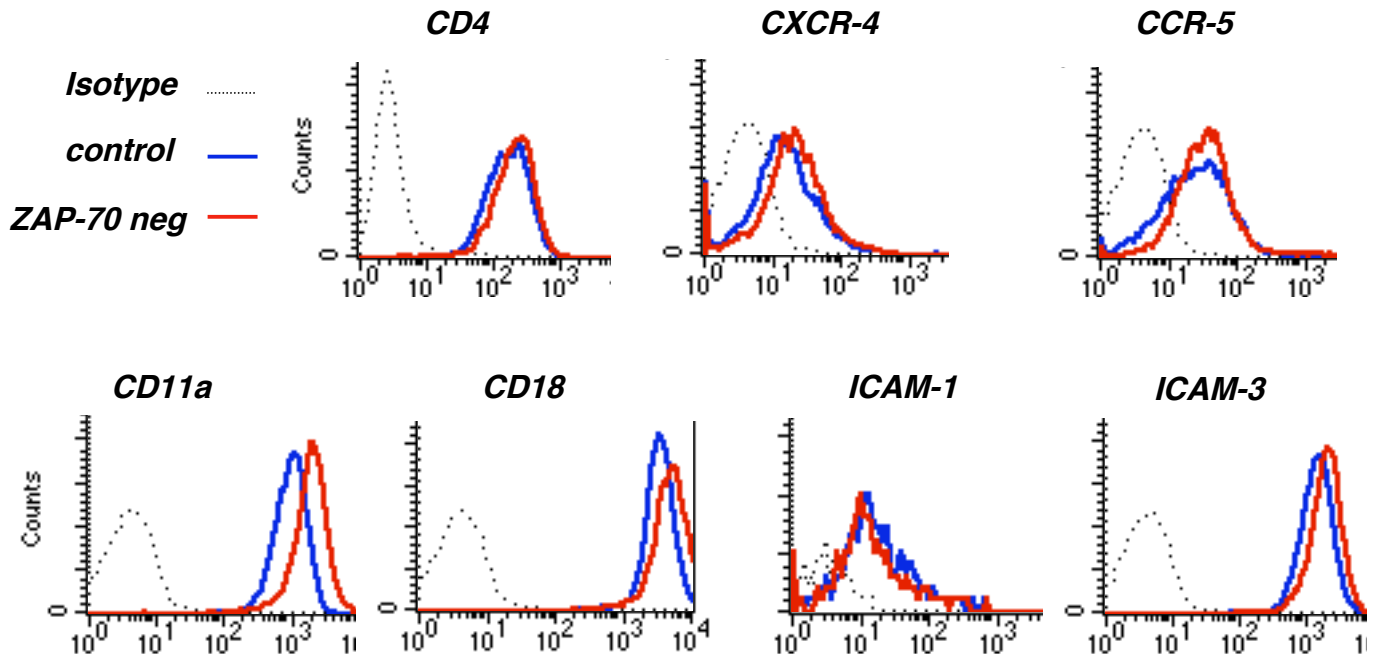

Supplement: 7601509s1.pdf [file 7601509s1.pdf]
